# Supplementary material for: Patient-Specific Screening Using High-Grade Glioma Explants to Determine Potential Radiosensitization by a TGF-β Small Molecule Inhibitor
Source: PubMed Central journal article supplement — Neoplasia. 2016 Dec 12;18(12):795–805. doi: 10.1016/j.neo.2016.08.008 (PMC5156509; doi:10.1016/j.neo.2016.08.008), 2016-12-12

## Supplemental information

**Supplemental Table 1. Grading of p-Smad2 immunostaining, along with the histopathology and molecular pathology of HGG specimens used in Figure 1.**

**Supplemental Table 2. Molecular characteristics of specimens used for explant culture.** WGS, whole genome sequencing; NGS, next generation sequencing; N/A: not available.

**Supplemental Table 3. Table summarizing the time-points and experiments performed on each explant.** (IF: Immunofluorescence, N/A: not available)

**Supplemental Figure 1. Copy number variation analysis of the specimens used for explant cultures.** 450K DNA methylation array analysis of the explants used in the study reveals various copy number variations.

**Supplemental Figure 2. Fraction of p-Smad2+ cells in individual explant.** Raw data for the percentage of p-Smad2+ nuclei upon RIKI, TGF- $\beta$  or combined treatments in 6 HGG explants. ns, not significant; \*,  $P < 0.05$ ; \*\*,  $P < 0.01$ .

**Supplemental Figure 3. Characterization of nuclei on the basis of  $\gamma$ -H2AX immunoreactivity.** **A.** IR significantly increased the percentage of  $\gamma$ -H2AX+ cells (nuclei) at both the 30-min and the 60-min marks, while RIKI had no effect ( $F_{(5,34)}=5.662$ ,  $P<0.001$ ). **B.** There was no correlation between the percentage of  $\gamma$ -H2AX+ cells and the number of  $\gamma$ -H2AX+ foci/positive nucleus (Spearman coefficient  $r=0.061$ ,  $P=0.897$ ). Each point represents averaged data from the 30-min and 60-min marks after IR. The line obtained with linear regression analysis represents the best-fit linear representation of the relationship between the two variables. **C.** The size of  $\gamma$ -H2AX- nuclei was significantly smaller than that of  $\gamma$ -H2AX+ nuclei (two-tailed t-test,  $P<0.001$ ). A total of 524 nuclei were counted for this analysis. **D.** Representative microscopic images

of explant cultures 60 min following IR demonstrate that intratumoral leukocytes (CD45+) and tumor stem cells (Sox2+) both respond to IR with induction of  $\gamma$ -H2AX foci. Arrows indicate  $\gamma$ -H2AX- nuclei. Nuclei were stained with DAPI (blue). ns, not significant; \*,  $P < 0.05$ ; \*\*,  $P < 0.01$ ; \*\*\*,  $P < 0.001$ .

**Supplemental Figure 4. Nuclear Sox2 immunoreactivity in individual explants.** Raw data for the intensity of nuclear Sox2 immunoreactivity upon RIKI, TGF- $\beta$  or combined treatments in HGG explants L49 (i), L50 (ii), L52 (iii), L53 (iv), L54 (v), and L55 (vi). ANOVA for each explant showed significant effect of treatment (all  $P < 0.02$ ). Pertinent *post hoc* comparisons are shown in the figure. A.U., arbitrary units; ns, not significant; \*,  $P < 0.05$ ; \*\*,  $P < 0.01$ ; \*\*\*\*,  $P < 0.001$ .

| Patient | Age | Sex | Diagnosis                                    | IDH1 status | 1p/19q status | Prior radiation | p-Smad2 /Observer 1 | p-Smad2 /Observer 2 |
|---------|-----|-----|----------------------------------------------|-------------|---------------|-----------------|---------------------|---------------------|
| 1       | 40  | M   | AO (WHO III)                                 | mutant      | co-deleted    | No              | +++ /++++           | ++++                |
| 2       | 24  | F   | GBM with oligodendroglial component (WHO IV) | mutant      | co-deleted    | Yes             | ++ /+++             | ++ /+++             |
| 3       | 30  | F   | GBM (WHO IV)                                 | mutant      |               | No              | +++ /++++           | ++++                |
| 4       | 57  | F   | GBM (WHO IV)                                 | wt          |               | No              | - /+++              | - /+++              |
| 5       | 54  | F   | GBM (WHO IV)                                 | wt          |               | No              | +++ /++++           | ++++                |
| 6       | 63  | F   | GBM (WHO IV)                                 | wt          |               | No              | ++ /+++             | +++                 |
|         | 65  | F   | GBM (WHO IV) - recurrent                     | wt          |               | Yes             | +++ /++++           | ++++                |
| 7       | 70  | M   | GBM (WHO IV)                                 | wt          |               | No              | + /+++              | +++                 |
|         | 71  | M   | GBM (WHO IV) - recurrent                     | wt          |               | Yes             | - /++               | ++                  |
| 8       | 77  | M   | GBM (WHO IV)                                 | wt          |               | No              | + /+++              | +++                 |
| 9       | 62  | F   | GBM (WHO IV) - recurrent                     | wt          |               | Yes             | +++ /++++           | +++ /++++           |
| 10      | 82  | F   | GBM (WHO IV)                                 | wt          |               | No              | ++ /++++            | ++++                |
| 11      | 48  | F   | GBM (WHO IV)                                 | wt          |               | No              | - /++++             | - /++++             |
| 12      | 42  | F   | GBM (WHO IV)                                 | wt          |               | No              | ++ /++++            | ++++                |

Supplemental Table 1

| Patient sample number | Subtype by DNA Methylation | Histology                     | IDH1 status | MGMT promoter methylation | EGFR amplification | 1p/19q co-deletion | Other changes inferred by WGS or focused NGS | Radiation status |
|-----------------------|----------------------------|-------------------------------|-------------|---------------------------|--------------------|--------------------|----------------------------------------------|------------------|
| L46                   | Non-RTK1 GBM               | GBM                           | wild-type   | Methylated                | Amplified          |                    |                                              | Naïve            |
| L49                   | Non-RTK1 GBM               | GBM with sarcomatous features | wild-type   | Methylated                | Not amplified      | Co-deleted         |                                              | Naïve            |
| L50                   | RTK1 GBM (proneural)       | GBM                           | wild-type   | Not methylated            | Amplified          |                    |                                              | Naïve            |
| L52                   | Non-RTK1 GBM               | GBM                           | wild-type   | Not methylated            | Amplified          |                    | TP53 mutation, PTEN mutation                 | Naïve            |
| L53                   | Non-RTK1 GBM               | GBM                           | wild-type   | Methylated                | Not amplified      |                    | Mdm2 and CDK4 amplification; PTEN loss       | Naïve            |
| L54                   | Non-RTK1 GBM               | GBM                           | wild-type   | Methylated                | Not amplified      | Intact             | PTEN mutation                                | Naïve            |
| L55                   | N/A                        | Anaplastic astrocytoma        | wild-type   | Not methylated            | Amplified          |                    |                                              | Radiated         |

|                                    | <b>L46</b> | <b>L49</b>      | <b>L50</b>      | <b>L52</b>      | <b>L53</b>      | <b>L54</b>      | <b>L55</b>      |
|------------------------------------|------------|-----------------|-----------------|-----------------|-----------------|-----------------|-----------------|
| <b>Time points post-radiation</b>  | 1 hour     | 30 min & 1 hour | 30 min & 1 hour | 30 min & 1 hour | 30 min & 1 hour | 30 min & 1 hour | 30 min & 1 hour |
| <b><math>\gamma</math>-H2AX IF</b> | Valid      | Valid           | Valid           | Valid           | Valid           | Valid           | Valid           |
| <b>p-Smad2 IF</b>                  | Valid      | Valid           | N/A             | Valid           | Valid           | Valid           | Valid           |
| <b>Sox2 IF</b>                     | N/A        | Valid           | Valid           | Valid           | Valid           | Valid           | Valid           |

Supplemental  
Table 3

# Copy number variation profiles by DNA Methylation array

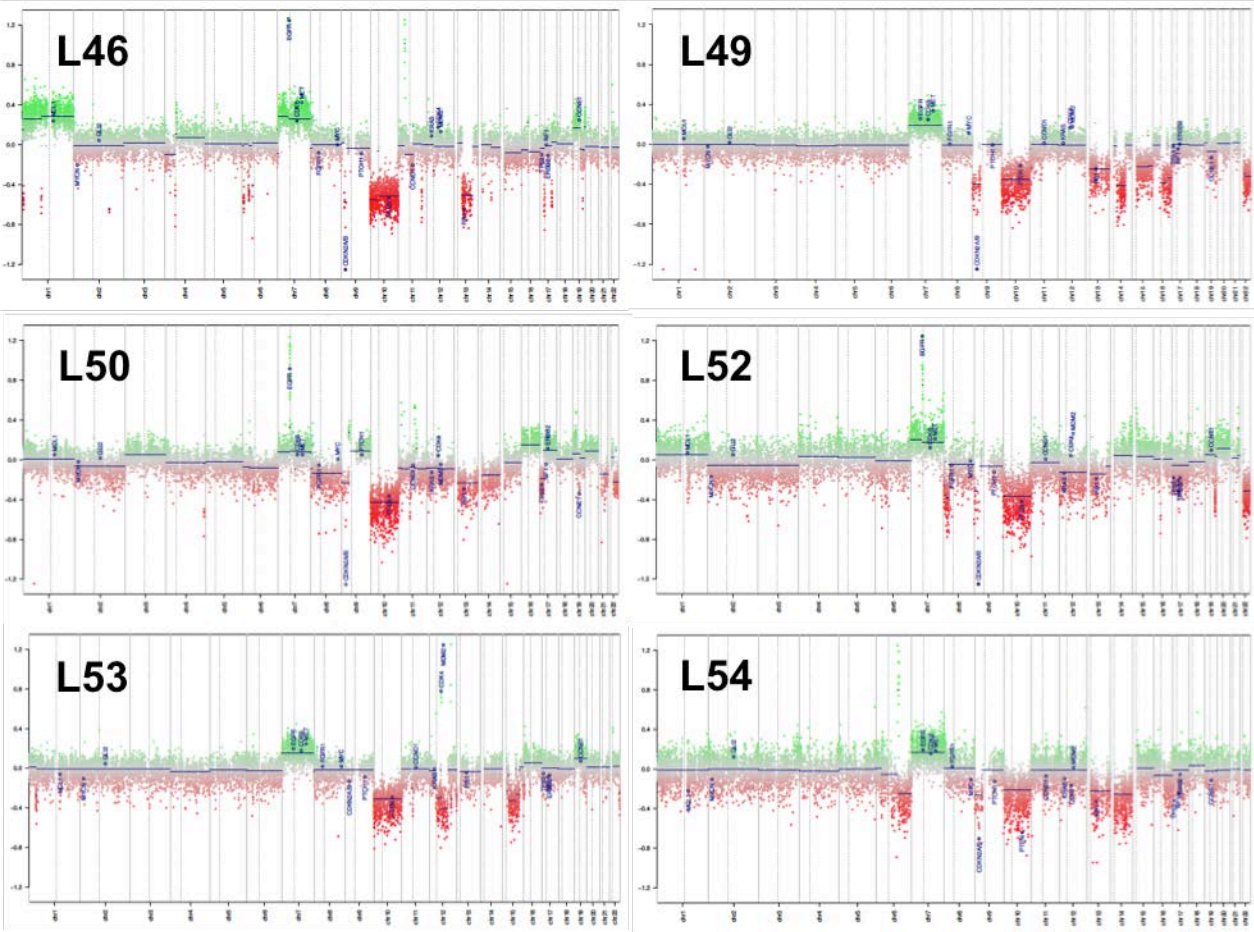

→  
Chromosome number (1-22)

Supplemental  
Figure 1

# Specimen numbers

L46 L49 L52 L53 L54 L55

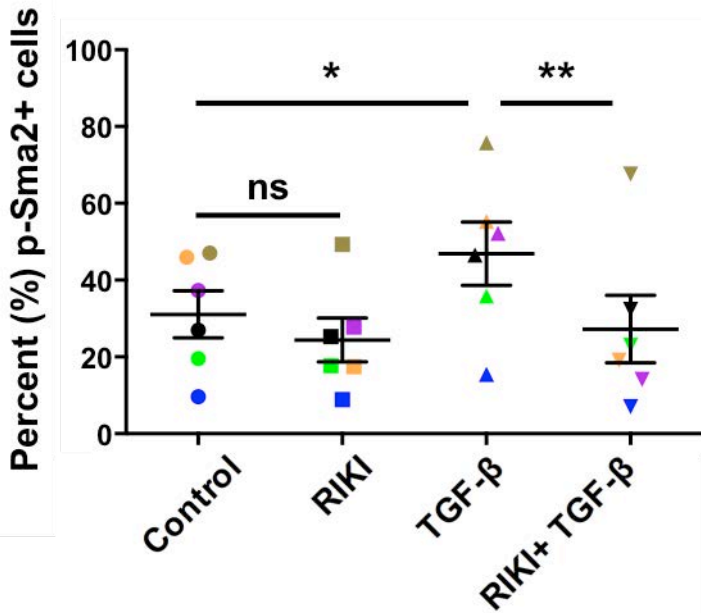

Supplemental  
Figure 2

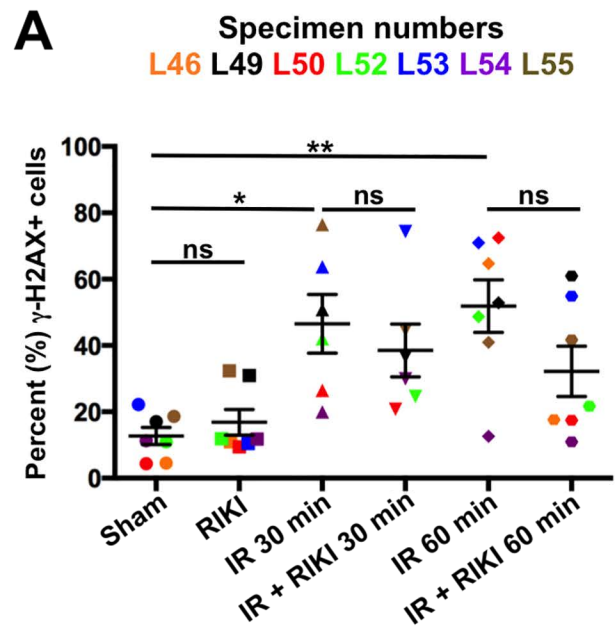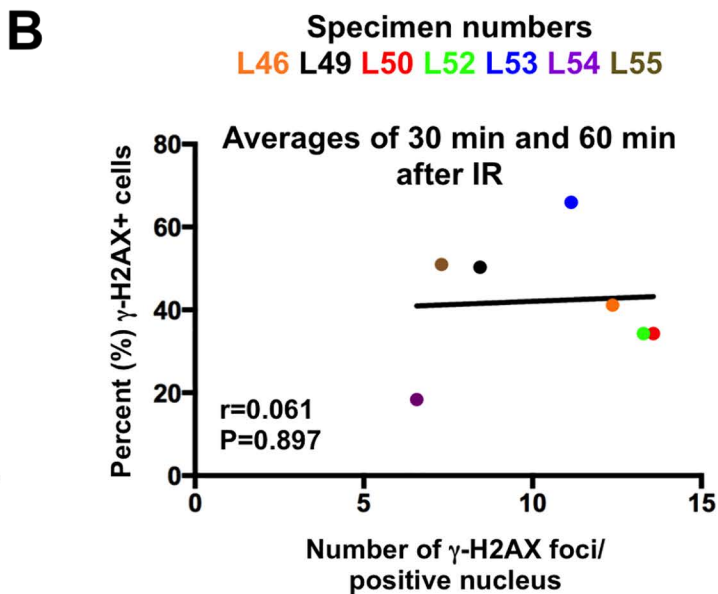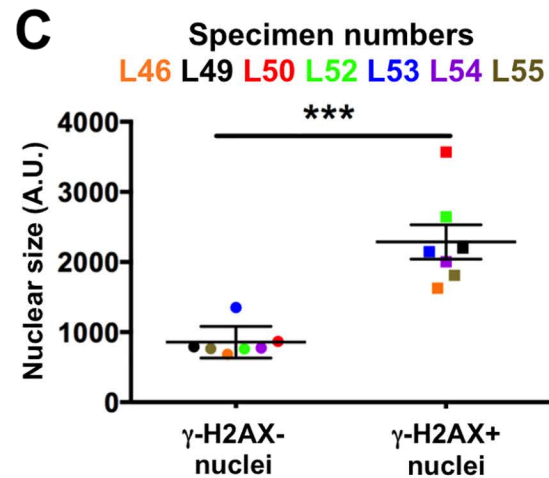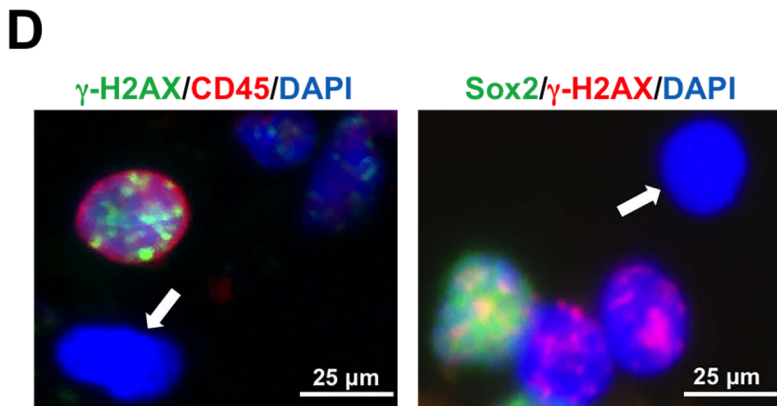



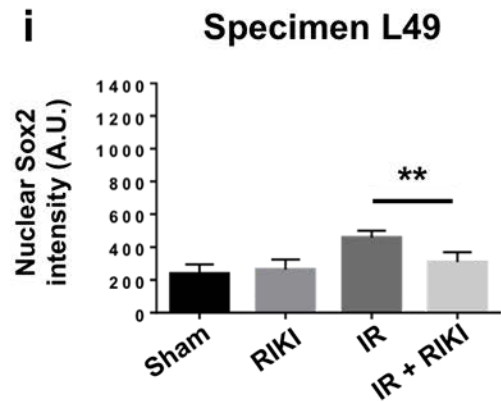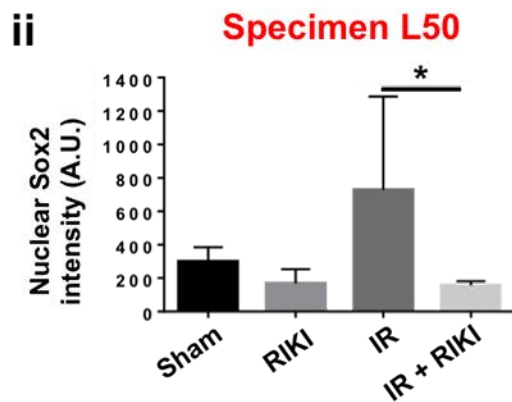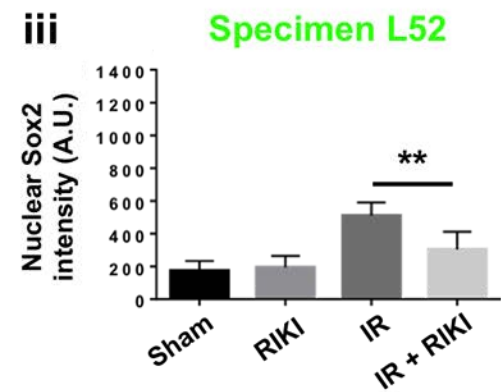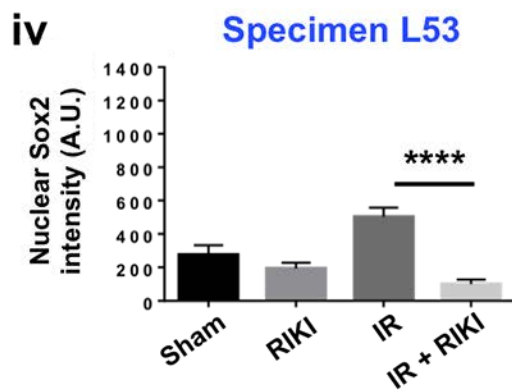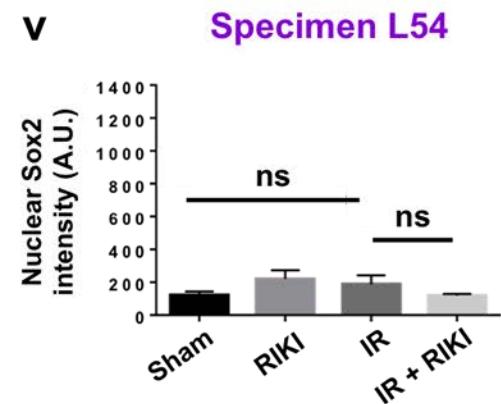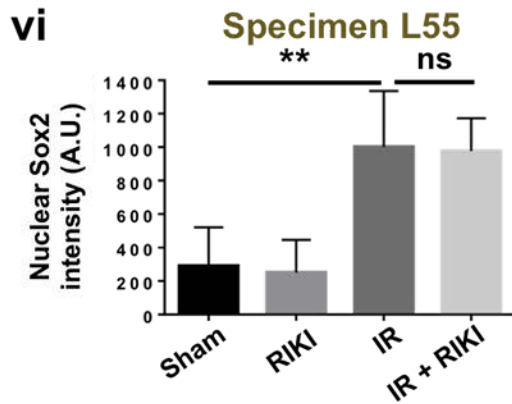

Supplement: mmc1.pdf [file mmc1.pdf]
